# Supplementary material for: BMP-7 induces apoptosis in human germinal center B cells and is influenced by TGF-β receptor type I ALK5
Source: PubMed Central journal article supplement (PMC5425193; doi:10.1371/journal.pone.0177188), 2017-05-10
Supplement: pone.0177188.s004.pdf [file pone.0177188.s004.pdf]

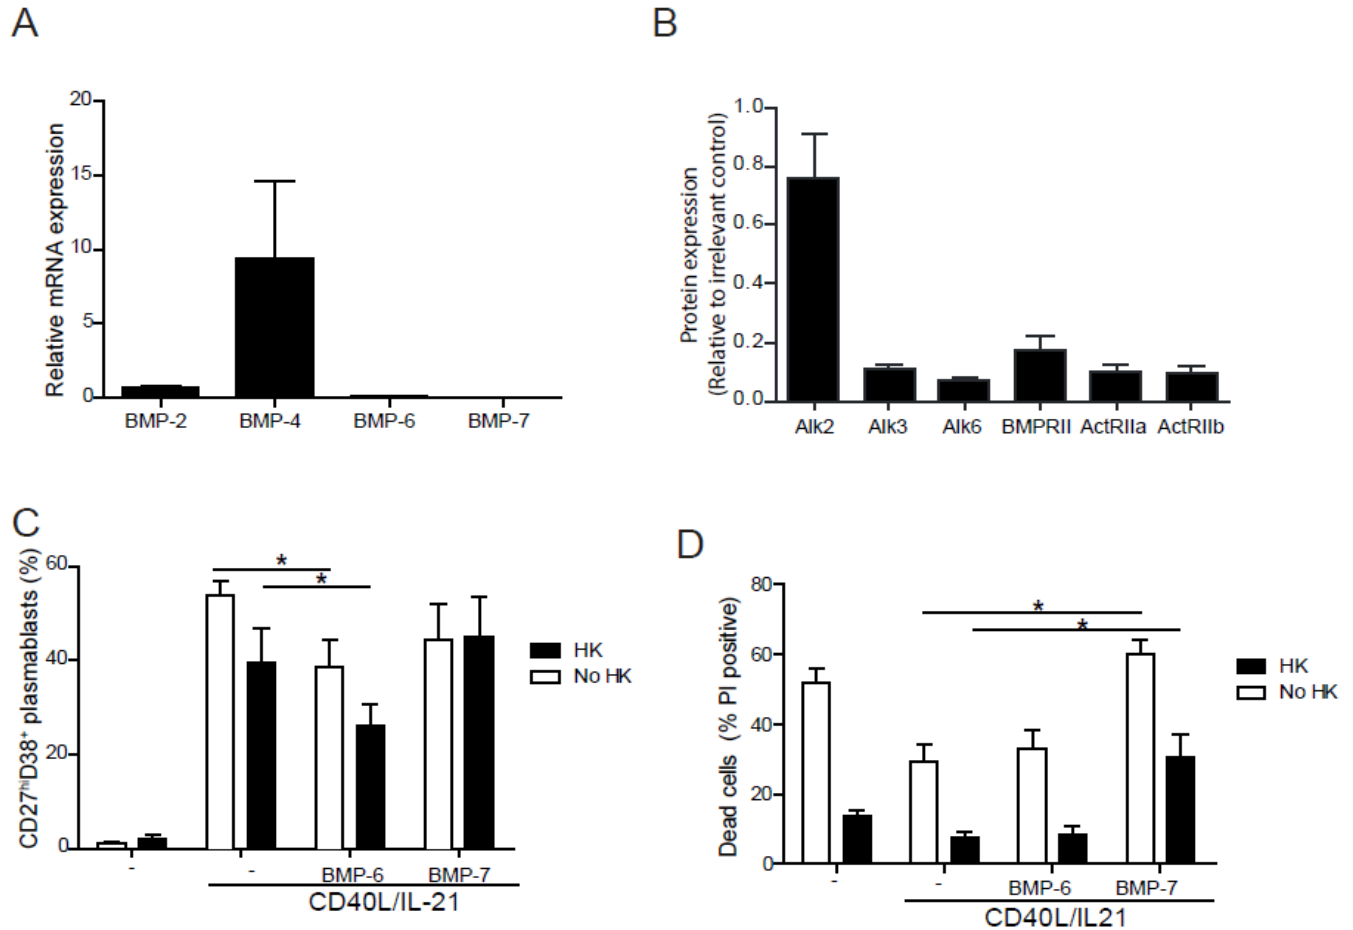

### Supplemental Figure 3

**BMP and BMPR expression in the HK cell line could influence BMP effects, but BMP-induced effects in memory B cells remains comparable in the presence or absence of HK cells.**

(A) RNA was isolated from the HK cell line and analyzed by qPCR. The samples were run in singleplex with PGK-1 as endogenous control. Relative mRNA expression was calculated by using the  $\Delta\Delta CT$ -method, and normalized to the level in human fetal brain, mean  $\pm$  SD,  $n = 2$ . (B) The HK cell line was stained with biotinylated antibodies, followed by streptavidin PE and flow cytometry analysis. Shown here are arcsinh transformed data, relative to irrelevant control, mean  $\pm$  SEM,  $n = 3$ . (C,D) IgD<sup>-</sup> memory B cells from peripheral blood were obtained using immunomagnetic beads and cultured for 6 days before assessing (C) plasmablast differentiation or (D) viability (PI-staining) by flow cytometry. Shown here are mean  $\pm$  SEM,  $n = 4$ . \* denotes statistical significance calculated by a paired, two-tailed Student's  $t$ -test.
