# Supplementary material for: BMP-7 induces apoptosis in human germinal center B cells and is influenced by TGF-β receptor type I ALK5
Source: PubMed Central journal article supplement (PMC5425193; doi:10.1371/journal.pone.0177188), 2017-05-10

## Supplemental Figure 4

### BMP-7 induces cell death in GC B cells.

Bead-isolated GC B cells from human tonsils were seeded in 48-well plates pre-coated with HK cells and cultured for four days. The cells were then stained with (PI) and analyzed by flow cytometry. Shown here are percent PI+ cells, mean  $\pm$  SEM,  $n = 3$ . \* denotes statistical significance ( $p < 0.05$ ), paired, two-tailed Student's  $t$ -test.

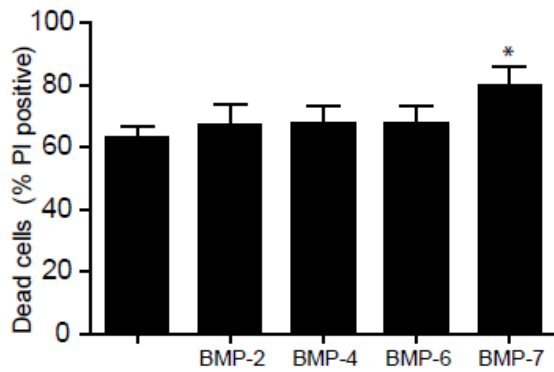

Supplement: pone.0177188.s005.pdf [file pone.0177188.s005.pdf]
