# Supplementary material for: BMP-7 induces apoptosis in human germinal center B cells and is influenced by TGF-β receptor type I ALK5
Source: PubMed Central journal article supplement (PMC5425193; doi:10.1371/journal.pone.0177188), 2017-05-10
Supplement: pone.0177188.s007.pdf [file pone.0177188.s007.pdf]

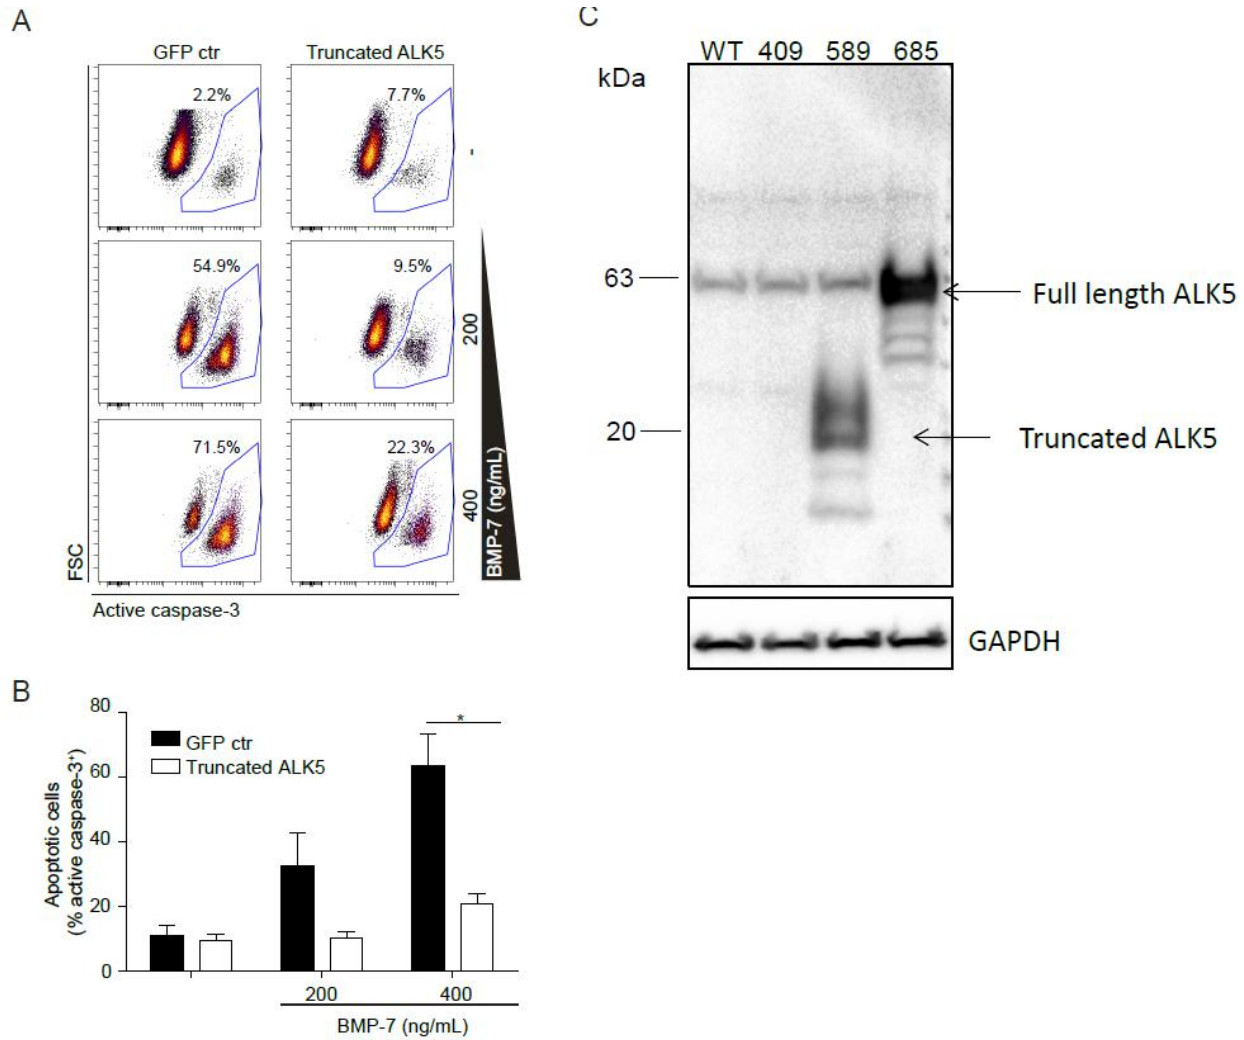

## Supplemental Figure 6

### Effects of BMP-7 in Mino cells expressing truncated ALK5.

Mino cells were transduced with GFP control or with truncated ALK5. Transduced Mino cells were cultured in X-VIVO 15 and left unstimulated or stimulated with BMP-7 (200 or 400 ng/ml) for 72

hours and stained for active caspase-3 before analysis by flow cytometry. (A) One representative

experiment and (B) mean  $\pm$  SEM,  $n = 3$ . (C) Detection of full length ALK5 or truncated ALK5 in

Mino cells: WT:original cells, 409: GFP control, 589: truncated ALK5, 685: full length ALK5. \*  $p < 0.05$ ; two-tailed, paired Student's  $t$ -test.
