# Supplementary material for: BMP-7 induces apoptosis in human germinal center B cells and is influenced by TGF-β receptor type I ALK5
Source: PubMed Central journal article supplement (PMC5425193; doi:10.1371/journal.pone.0177188), 2017-05-10
Supplement: pone.0177188.s008.pdf [file pone.0177188.s008.pdf]

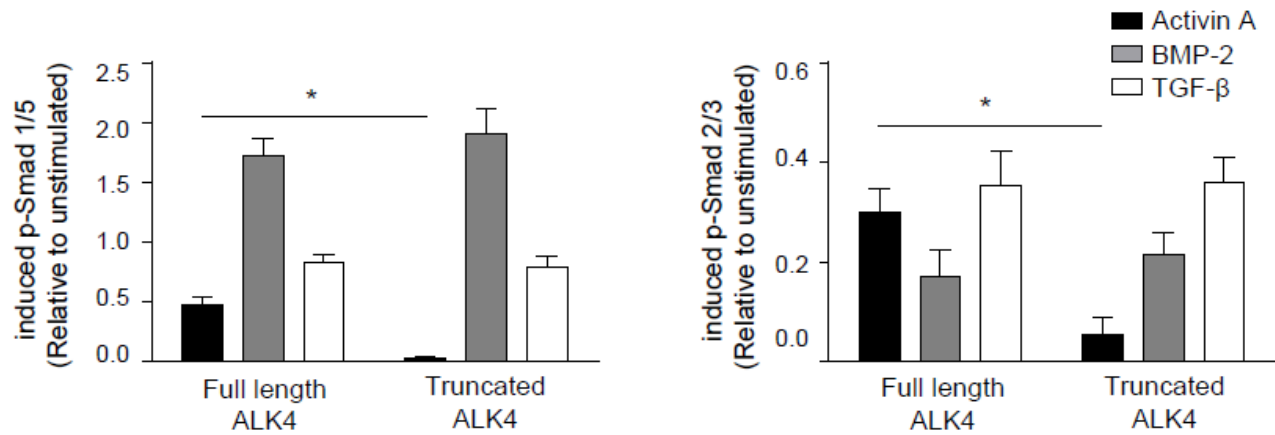

## Supplemental Figure 7

### Activin A-induced signaling in cells overexpressing FL ALK4 or truncated ALK4.

Mino cells were transduced with full length or truncated ALK4. The transduced cells were cultured in serum free media (X-VIVO 15) over night and then left in medium alone (unstim) or stimulated with Activin A, BMP-2, or TGF- $\beta$  for 60 min, before detection of phosphorylated (p-) Smad 1/5 or p-Smad 2/3 by flow cytometry. Induced phosphorylation is shown relative to unstimulated cells, using arcsinh transformation of median fluorescence intensity data. Mean  $\pm$  SEM,  $n = 3$ . \*  $p < 0.05$ ; two-tailed, paired Student's  $t$ -test.
