# Supplementary material for: BMP-7 induces apoptosis in human germinal center B cells and is influenced by TGF-β receptor type I ALK5
Source: PubMed Central journal article supplement (PMC5425193; doi:10.1371/journal.pone.0177188), 2017-05-10
Supplement: pone.0177188.s009.pdf [file pone.0177188.s009.pdf]

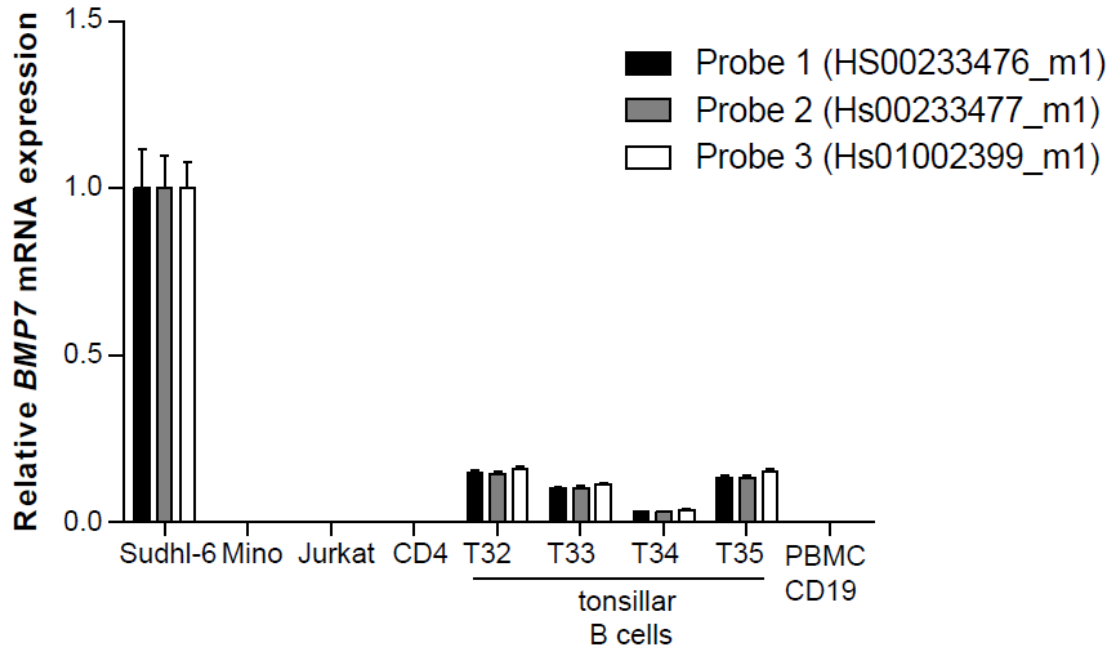

### Supplemental Figure 8

#### Relative mRNA expression of BMP-7 in tonsillar B cells.

Primary tonsillar B cells were obtained by immunomagnetic bead isolation by negative selection for T cells (CD3 Dynabeads). Gene expression of BMP7 was determined by qPCR duplicates for 3 different probes and is shown relative to PGK-1 and GAPDH endogenous control and normalized to Sudhl-6.

Mean  $\pm$  SD.
